# Supplementary material for: Multidimensional gene search with Genehopper
Source: PubMed Central journal article supplement (PMC4489220; doi:10.1093/nar/gkv511), 2015-05-18
Supplement: supp_gkv511_nar-00291-web-b-2015-File006.pdf [file supp_gkv511_nar-00291-web-b-2015-File006.pdf]

## Supplementary Information

| Gen-Id | Attribut 1 | Attribut 2                                                                                                                                                                                                                                      | Attribut 3                                                                          | Attribut 4                                                                                                                                                                                                                                                                       | ... Attribut m                                                             |
|--------|------------|-------------------------------------------------------------------------------------------------------------------------------------------------------------------------------------------------------------------------------------------------|-------------------------------------------------------------------------------------|----------------------------------------------------------------------------------------------------------------------------------------------------------------------------------------------------------------------------------------------------------------------------------|----------------------------------------------------------------------------|
|        |            | ENSG00000223972, 100287596,<br>100287102, 37102,<br>DDX11L1_001, DDX11L1_002,<br>DDX11L1_202, DDX11L1_201,<br>OTTHUMG00000000961,<br>OTTHUMT00000362751,<br>OTTHUMT00000002844,<br>NR_046018, NR_051986,<br>uc001aaa_3, Hs_714157,<br>Hs_618434 | DDX11L5,<br>DDX11L1,<br>NR_046018_2,<br>NR_051986_1,<br>DDX11L1_002,<br>DDX11L1_001 | DEAD/H<br>(Asp_Glu_Ala_Asp/His) box<br>helicase 11 like 5,<br>DEAD/H<br>(Asp_Glu_Ala_Asp/His) box<br>helicase 11 like 1, Homo<br>sapiens DEAD/H<br>(Asp_Glu_Ala_Asp/His) box<br>helicase 11 like 1<br>(DDX11L1), non_coding<br>RNA, Homo sapiens DEAD/H<br>(Asp_Glu_Ala_Asp/His) | rs58108140,<br>rs189107123,<br>rs180734498,<br>rs144762171,<br>rs151276476 |
| 1      | 2          |                                                                                                                                                                                                                                                 |                                                                                     |                                                                                                                                                                                                                                                                                  |                                                                            |
| ...    |            |                                                                                                                                                                                                                                                 |                                                                                     |                                                                                                                                                                                                                                                                                  |                                                                            |
| n      |            |                                                                                                                                                                                                                                                 |                                                                                     |                                                                                                                                                                                                                                                                                  |                                                                            |

**Supplementary Figure 1.** Exemplary layout of the dedicated database table that is used in the term-to-gene search.

$$\mathbf{PrefixDistance}(s, t) = \mathbf{length}(s) + \mathbf{length}(t) - 2\mathbf{CommonPrefix}(s, t)$$

**Supplementary Figure 2.** We used the prefix distance as string metric to compare pairs of gene symbols s and t.

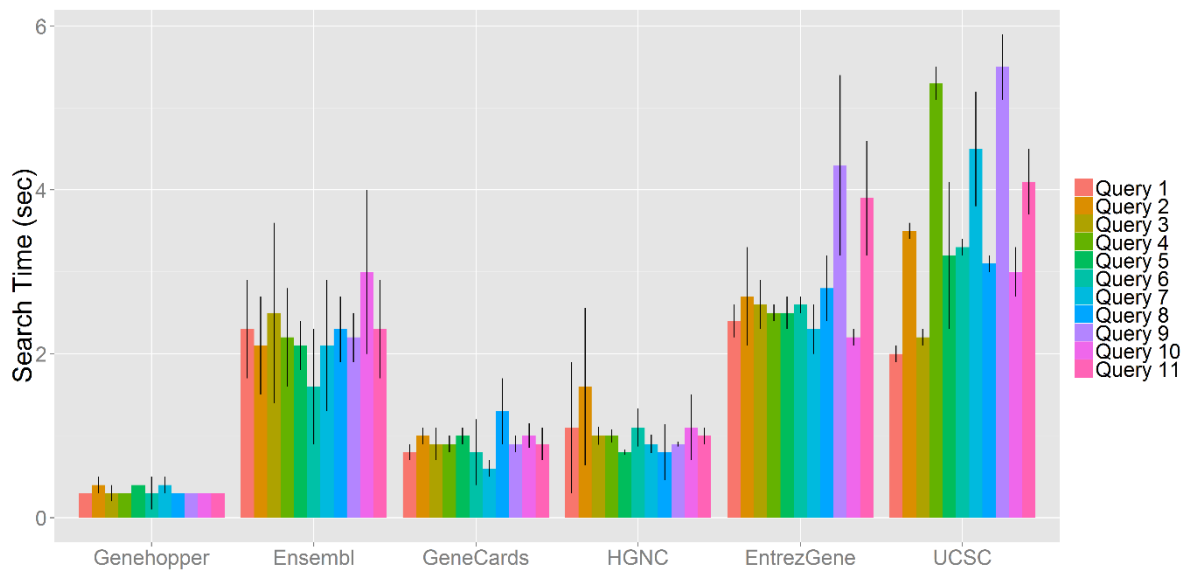

**Supplementary Figure 3.** Search time for Genehopper and five other search engines we considered in our performance test. We tested with eleven queries (1: CCR2; 2: PPARG; 3: CCN1; 4: RS1; 5: PCSK1; 6: Cannabinoid; 7: Cann; 8: Narcolepsy; 9: 100287102; 10: rs144303289; 11: ENSG00000069812) and 10 repeats per query in the Google Chrome Browser.

| #  | Label                | Computed by UniProt Feature                                        |
|----|----------------------|--------------------------------------------------------------------|
| 1  | Transmembrane        | Presence of transmembrane domains                                  |
| 2  | Signal               | Presence of signal domains                                         |
| 3  | Lipid                | Presence of lipid anchors                                          |
| 4  | Transcription Factor | Transcription Factor (presence of domains like IPR002070, ...)     |
| 5  | NHR                  | Nuclear hormone receptor (presence of IPR000536)                   |
| 6  | NOR                  | Nuclear orphan receptor (presence of IPR003070)                    |
| 7  | Ionchannel           | Ion Channel (description; presence of domains like IPR000272, ...) |
| 8  | GPCR                 | Class A G-Protein coupled receptor (presence of IPR000276)         |
| 9  | Enzyme               | Enzyme (field "EC" is defined)                                     |
| 10 | Kinase               | Kinase (EC number 2.7.x)                                           |
| 11 | Protease             | Protease (EC number 3.4.x)                                         |
| 12 | Phosphatase          | Phosphatase (EC number 3.[1 5].x)                                  |
| 13 | PDE                  | PDE (ID PDE* or presence of IPR002073)                             |
| 14 | Disease              | Disease related (presence of comment "Disease")                    |
| 15 | Monogenetic Disease  | Monogenetic disease (Disease comment like "is a cause of ...")     |
| 16 | OMIM                 | Has reference to OMIM Gene-Phenotype relationship (UniProt)        |
| 17 | Cytoplasm            | Subcellular location in Cytoplasm (Comment)                        |
| 18 | Golgi                | Subcellular location in Golgi apparatus (Comment)                  |
| 19 | Membrane             | Subcellular location in Membrane (Comment)                         |
| 20 | Mitochondrion        | Subcellular location in Mitochondrion (Comment)                    |
| 21 | Nucleus              | Subcellular location in Nucleus (Comment)                          |
| 22 | Secreted             | Secreted (Comment)                                                 |
| 23 | Ubiquitome           | Ubiquitome E3 or DUB (presence like IPR001841 or IPR001578, ...)   |
| 24 | Epigenome            | Epigenome (DNA [Methyl Acetyl]ation / De-acetylation)              |

**Supplementary Table 1.** 24 Gene protein product features vectors were computed according to the presence (value = 1) of absence (value = 0) of UniProtKB/Swiss-Prot Annotations (sequence related: 1-3; family related 4-13, 23, 24; disease related 14-16; sub-cellular localization 17-22). These vectors represent the data from which the similarity  $S_{SPF}$  was calculated.

| No. | Query           | Query Type                 | Expected Gene |
|-----|-----------------|----------------------------|---------------|
| 1   | CCR2            | Gene Symbol                | CCR2          |
| 2   | PPARG           | Gene Symbol                | PPARG         |
| 3   | CCN1            | Gene Symbol                | CYR61         |
| 4   | RS1             | Gene Symbol                | RS1           |
| 5   | PCSK1           | Gene Symbol                | PCSK1         |
| 6   | Cannabinoid     | Receptor Family, Gene Name | CNR1, CNR2    |
| 7   | Cann            | Substring of 'Cannabinoid' | CNR1, CNR2    |
| 8   | Narcolepsy      | Phenotype                  | MOG, HCRT     |
| 9   | 100287102       | Entrez Gene ID             | DDX11L1       |
| 10  | rs144303289     | dbSNP ID                   | RASGRP1       |
| 11  | ENSG00000069812 | Ensembl ID                 | HES2          |

**Supplementary Table 2.** Queries and the expected gene that we used for the comparison of the ranking quality of the Genehopper's term-to-gene search with other search engines. The results are shown in Supplementary Table 4.

| No                                             | Query           | GeneHopper | Ensembl        | GeneCards | HGNC | EntrezGene     | UCSC              |
|------------------------------------------------|-----------------|------------|----------------|-----------|------|----------------|-------------------|
| 1                                              | CCR2            | 1          | 1              | 1         | 1    | 1              | 1                 |
| 2                                              | PPARG           | 1          | 1              | 1         | 1    | 1              | 1                 |
| 3                                              | CCN1            | 1          | 1              | 1         | 2    | 1              | 2                 |
| 4                                              | RS1             | 1          | 1              | 1         | 1    | 1              | 1                 |
| 5                                              | PCSK1           | 1          | 1              | 1         | 1    | 1              | 1                 |
| 6                                              | Cannabinoid     | 1; 2       | 1; 2           | 1; 2      | 1; 2 | 1; 2           | 1; 2              |
| 7                                              | Cann            | 1; 2       | 1 <sup>a</sup> | -         | -    | -              | 1; 2 <sup>b</sup> |
| 8                                              | Narcolepsy      | 1; 2       | 1; 2           | 7; 15     | -    | 10; 14         | 1; 2              |
| 9                                              | 100287102       | 1          | -              | 1         | 1    | 1 <sup>e</sup> | -                 |
| 10                                             | rs144303289     | 1          | c              | 1         | -    | c              | c                 |
| 11                                             | ENSG00000069812 | 1          | 1              | 1         | 1    | 1 <sup>d</sup> | d                 |
| - gene not listed in result set                |                 |            |                |           |      |                |                   |
| <sup>a</sup> CNR2 not in result set            |                 |            |                |           |      |                |                   |
| <sup>b</sup> in category of RefSeq genes       |                 |            |                |           |      |                |                   |
| <sup>c</sup> no gene assignment                |                 |            |                |           |      |                |                   |
| <sup>d</sup> no name resolution                |                 |            |                |           |      |                |                   |
| <sup>e</sup> immediate forwarding to gene page |                 |            |                |           |      |                |                   |

**Supplementary Table 3.** Comparison of the ranking quality for 11 queries that were applied to the search engines of GeneHopper, Ensembl, GeneCards, HGNC, EntrezGene and UCSC by comparing the ranking positions of the expected genes in the respective search results. For queries 6, 7 and 8 two genes are expected, thus two ranking positions are shown. The expected genes are listed in Supplementary Table 3.

|                  | S <sub>HOM</sub> | S <sub>IPD</sub> | S <sub>VP</sub> | S <sub>SPF</sub> | S <sub>CC</sub> | S <sub>MF</sub> | S <sub>BP</sub> | S <sub>NEX</sub> | S <sub>HGS</sub> |
|------------------|------------------|------------------|-----------------|------------------|-----------------|-----------------|-----------------|------------------|------------------|
| S <sub>HOM</sub> |                  | 5E+04            | 2E+03           | 3E+04            | 4E+04           | 5E+04           | 4E+04           | 4E+04            | 1E+06            |
| S <sub>IPD</sub> | 5E+04            |                  | 7E+03           | 1E+06            | 2E+06           | 2E+06           | 2E+06           | 2E+06            | 5E+05            |
| S <sub>VP</sub>  | 2E+03            | 7E+03            |                 | 1E+05            | 2E+05           | 2E+05           | 2E+05           | 3E+05            | 3E+04            |
| S <sub>SPF</sub> | 3E+04            | 1E+06            | 1E+05           |                  | 6E+07           | 5E+07           | 6E+07           | 7E+07            | 5E+06            |
| S <sub>CC</sub>  | 4E+04            | 2E+06            | 2E+05           | 6E+07            |                 | 8E+07           | 1E+08           | 1E+08            | 8E+06            |
| S <sub>MF</sub>  | 5E+04            | 2E+06            | 2E+05           | 5E+07            | 8E+07           |                 | 9E+07           | 1E+08            | 7E+06            |
| S <sub>BP</sub>  | 4E+04            | 2E+06            | 2E+05           | 6E+07            | 1E+08           | 9E+07           |                 | 1E+08            | 7E+06            |
| S <sub>NEX</sub> | 4E+04            | 2E+06            | 3E+05           | 7E+07            | 1E+08           | 1E+08           | 1E+08           |                  | 1E+07            |
| S <sub>HGS</sub> | 1E+06            | 5E+05            | 3E+04           | 5E+06            | 8E+06           | 7E+06           | 7E+06           | 1E+07            |                  |

**Supplementary Table 4.** Size of input data to compute pairwise correlation between similarities. (Grey) Pearson, (White) Spearman.
